# Supplementary material for: Electronic structures and thermoelectric properties of layered BiCuOCh oxychalcogenides (Ch = S, Se and Te): first-principles calculations
Source: Royal Society of Chemistry journal article supplement (doi:10.1039/c3ta11222e), 2013-01-01
Supplement: c3ta11222e.pdf [file c3ta11222e.pdf]

## Supplementary Information for:

# Electronic structures and thermoelectric properties of layered oxychalcogenides BiCuOCh (*Ch* = S, Se, and Te): First-principles calculations

Daifeng Zou,<sup>a</sup> Shuhong Xie,<sup>a</sup> Yunya Liu,<sup>a,\*</sup> Jianguo Lin,<sup>a</sup> and Jiangyu Li<sup>b,\*</sup>

<sup>a</sup> *Key Laboratory of Low Dimensional Materials and Application Technology of Ministry of Education,*

*Faculty of Materials, Optoelectronics and Physics, Xiangtan University, Hunan 411105, China.*

<sup>b</sup> *Department of Mechanical Engineering, University of Washington, Seattle, WA 98195-2600, USA*

---

\* Corresponding author: [yliu@xtu.edu.cn](mailto:yliu@xtu.edu.cn).

\* Corresponding author: [jjli@u.washington.edu](mailto:jjli@u.washington.edu).

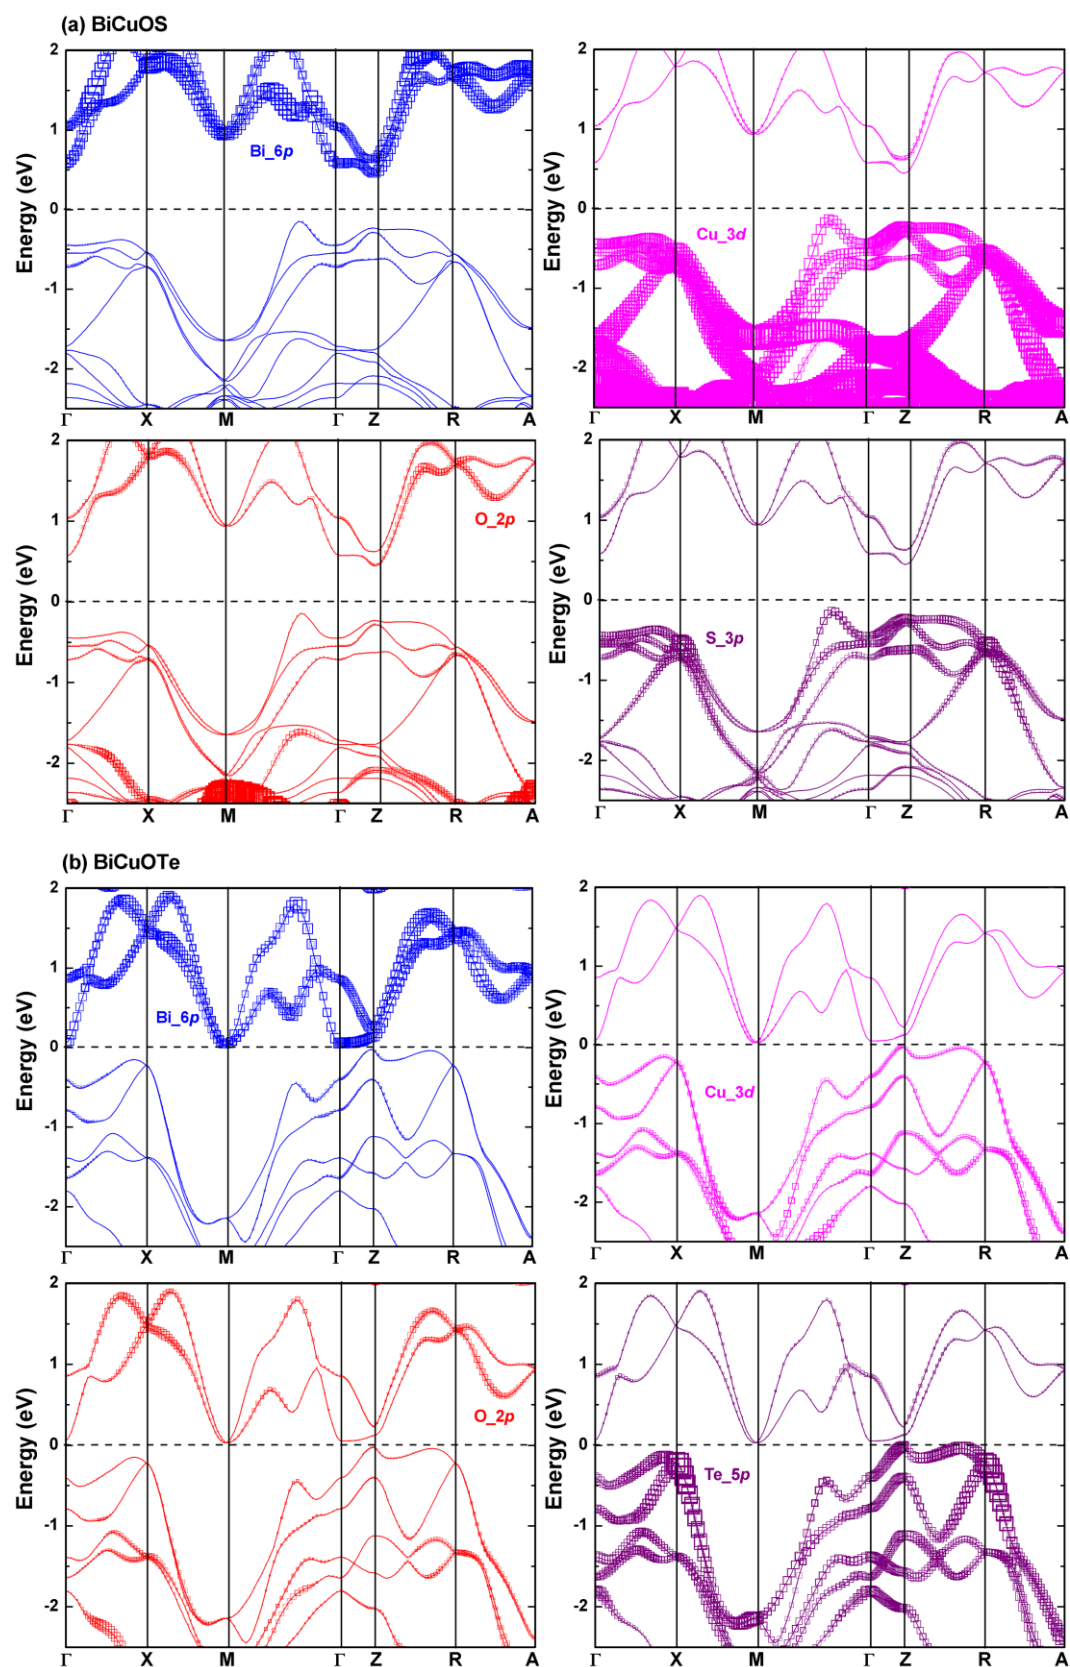

**Figure S1** The orbital-decomposed band structures of (a) BiCuOS and (b) BiCuOTe compounds: including the *p*-orbital of Bi (blue), the *d*-orbital of Cu (magenta), the *p*-orbital of O (red) and the *p*-orbitals of S or Te (violet). The Fermi levels are all set to zero.

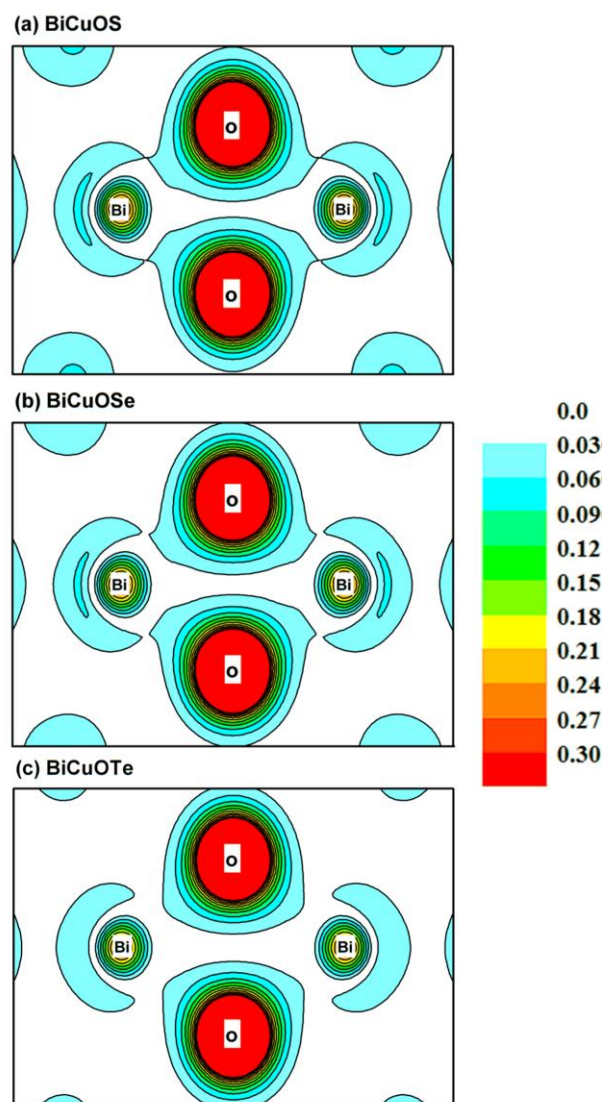

**Figure S2.** Contour plots of the partial charge density of the valence bands in the energy region of -5 to -2 eV for (a) BiCuOS, (b) BiCuOSe and (c) BiCuOTe on the Bi-O-Bi plane. The Fermi levels are set to zero. The unit of charge density is  $e/\text{\AA}^3$ . The white background means no charge density distributions existing in the area.

As seen in Figure S2, these three compounds have similar partial charge density distributions in the energy region of -5 to -2 eV, and they all show obvious antibonding characteristic between Bi and O states because there is a zero-charge-density gap between them. A lobe-shape charge density on the side of *Ch* atoms points to the  $(\text{Cu}_2\text{Ch}_2)^{2-}$  layer, which can be identified as Bi  $6s^2$  lone pairs.<sup>1</sup>

<sup>1</sup>R. Seshadri and N. A. Hill, *Chem. Mater.*, 2001, **13**, 2892.
